# Supplementary material
Source: bioRxiv or medRxiv preprint supplement (https://www.biorxiv.org/content/biorxiv/early/2021/05/05/869966/DC1/embed/media-1.pdf)
Supplement: Supplementary file [file media-1.pdf]

## Clumpy coexistence in phytoplankton: The role of functional similarity in

### community assembly.

#### Appendix 1 Clumpy coexistence in phytoplankton: The role of functional similarity in community assembly.

Table S1. Morphology based functional group (MBFG), individual volume (V), surface volume ratio (SV), maximum linear dimension (MLD), presence of flagella (F), siliceous exoskeleton (Si), aerotopes (A), and the code used to describe each species observed during the study.

| Taxa                           | MBFG | V<br>( $\mu\text{m}^3$ ) | SV  | MLD<br>( $\mu\text{m}$ ) | F | Si | M | A | code    |
|--------------------------------|------|--------------------------|-----|--------------------------|---|----|---|---|---------|
| Cyanobacteria                  |      |                          |     |                          |   |    |   |   |         |
| Chroococcales sp.              | I    | 4.2                      | 3.0 | 2.0                      | 0 | 0  | 0 | 0 | spp. 20 |
| Chroococcales sp. 2            | VII  | 169.7                    | 2.0 | 15.0                     | 0 | 0  | 1 | 0 | spp. 21 |
| Chroococcales sp. 3            | VII  | 171.6                    | 1.9 | 13.0                     | 0 | 0  | 1 | 0 | spp. 22 |
| Chroococcales sp. 4            | VII  | 83.8                     | 3.0 | 15.0                     | 0 | 0  | 1 | 0 | spp. 23 |
| <i>Chroococcus</i> sp.         | I    | 22.5                     | 1.7 | 3.5                      | 0 | 0  | 0 | 0 | spp. 18 |
| <i>cf. Cyanobium</i> sp.       | I    | 8.4                      | 2.6 | 4.0                      | 0 | 0  | 0 | 0 | spp. 19 |
| <i>Geitlerinema</i> sp.        | IV   | 79.2                     | 3.4 | 70.0                     | 0 | 0  | 0 | 0 | spp. 1  |
| <i>Geitlerinema</i> sp. 2      | IV   | 212.1                    | 2.7 | 120.0                    | 0 | 0  | 0 | 0 | spp. 2  |
| <i>Geitlerinema</i> sp. 3      | IV   | 57.7                     | 3.1 | 43.5                     | 0 | 0  | 0 | 0 | spp. 3  |
| <i>Jaaginema</i> sp.           | IV   | 84.3                     | 3.7 | 88.7                     | 0 | 0  | 0 | 0 | spp. 5  |
| <i>Komvophoron</i> sp.         | IV   | 31.8                     | 2.8 | 19.0                     | 0 | 0  | 0 | 0 | spp. 4  |
| <i>Limnothrix</i> sp.          | III  | 1570.8                   | 1.0 | 125.0                    | 0 | 0  | 0 | 1 | spp. 6  |
| <i>Limnothrix</i> sp. 2        | III  | 1256.6                   | 1.0 | 100.0                    | 0 | 0  | 0 | 1 | spp. 7  |
| <i>Limnothrix</i> sp. 3        | III  | 2428.9                   | 0.9 | 140.0                    | 0 | 0  | 0 | 1 | spp. 8  |
| <i>Merismopedia</i> sp.        | VII  | 343.0                    | 0.9 | 20.0                     | 0 | 0  | 1 | 0 | spp. 24 |
| <i>Oscillatoria</i> sp.        | IV   | 1361.9                   | 1.2 | 150.0                    | 0 | 0  | 0 | 0 | spp. 9  |
| <i>Oscillatoria</i> sp. 2      | IV   | 301.7                    | 1.5 | 49.0                     | 0 | 0  | 0 | 0 | spp. 10 |
| Oscillatoriales sp.            | IV   | 282.7                    | 1.4 | 40.0                     | 0 | 0  | 0 | 0 | spp. 33 |
| Oscillatoriales sp. 2          | IV   | 141.4                    | 1.4 | 20.0                     | 0 | 0  | 0 | 0 | spp. 34 |
| Oscillatoriales sp. 4          | IV   | 184.5                    | 1.4 | 26.1                     | 0 | 0  | 0 | 0 | spp. 35 |
| Oscillatoriales sp. 6          | IV   | 85.0                     | 1.7 | 16.0                     | 0 | 0  | 0 | 0 | spp. 36 |
| <i>Pseudanabaena catenata</i>  | IV   | 785.4                    | 2.0 | 250.0                    | 0 | 0  | 0 | 0 | spp. 12 |
| <i>Pseudanabaena limnetica</i> | IV   | 113.1                    | 2.7 | 64.0                     | 0 | 0  | 0 | 0 | spp. 11 |
| <i>Pseudanabaena</i> sp.       | IV   | 2828.6                   | 1.2 | 294.0                    | 0 | 0  | 0 | 0 | spp. 25 |

|                                                           |    |        |     |       |   |   |   |   |         |
|-----------------------------------------------------------|----|--------|-----|-------|---|---|---|---|---------|
| <i>Pseudanabaena</i> sp. 2                                | IV | 981.8  | 1.6 | 200.0 | 0 | 0 | 0 | 0 | spp. 26 |
| <i>Pseudanabaena</i> sp. 3                                | IV | 568.6  | 2.0 | 181.0 | 0 | 0 | 0 | 0 | spp. 27 |
| <i>Pseudanabaena</i> sp. 4                                | IV | 1011.2 | 1.6 | 206.0 | 0 | 0 | 0 | 0 | spp. 28 |
| <i>Pseudanabaena</i> sp. 5                                | IV | 213.6  | 2.0 | 68.0  | 0 | 0 | 0 | 0 | spp. 29 |
| <i>Pseudanabaenaceae</i> sp.                              | IV | 176.7  | 2.7 | 100.0 | 0 | 0 | 0 | 0 | spp. 30 |
| <i>Pseudanabaenaceae</i> sp. 2                            | IV | 106.2  | 3.1 | 80.0  | 0 | 0 | 0 | 0 | spp. 31 |
| <i>cf. Raphidiopsis</i>                                   | IV | 254.5  | 2.2 | 100.0 | 0 | 0 | 0 | 0 | spp. 32 |
| <i>Pseudanabaenaceae</i> sp. 7                            | IV | 21.2   | 4.1 | 27.0  | 0 | 0 | 0 | 0 | spp. 13 |
| <i>Romeria</i> sp.                                        | IV | 125.7  | 2.1 | 40.0  | 0 | 0 | 0 | 0 | spp. 14 |
| <i>cf. Spirulina</i>                                      | IV | 31.2   | 3.5 | 30.0  | 0 | 0 | 0 | 0 | spp. 15 |
| <i>Synechococcus</i> sp.                                  | I  | 4.2    | 3.0 | 4.0   | 0 | 0 | 0 | 0 | spp. 17 |
| <i>Synechocystis aquatilis</i>                            | IV | 32.3   | 1.5 | 4.0   | 0 | 0 | 0 | 0 | spp. 16 |
| <b>Bacillariophyceae</b>                                  |    |        |     |       |   |   |   |   |         |
| <i>Achnanthes cf. rupestoides</i>                         | VI | 569.4  | 0.9 | 29.0  | 0 | 1 | 0 | 0 | spp. 46 |
| <i>Achnanthes inflata</i>                                 | VI | 8812.2 | 0.3 | 68.0  | 0 | 1 | 0 | 0 | spp. 45 |
| <i>Achnanthes</i> sp.                                     | VI | 160.2  | 1.3 | 17.0  | 0 | 1 | 0 | 0 | spp. 47 |
| <i>Achnanthes</i> sp. 2                                   | VI | 99.0   | 1.8 | 21.0  | 0 | 1 | 0 | 0 | spp. 48 |
| <i>cf. Achnantheidium</i> sp.                             | VI | 48.7   | 3.1 | 31.0  | 0 | 1 | 0 | 0 | spp. 49 |
| <i>Amphora</i> sp.                                        | VI | 340.9  | 1.1 | 30.0  | 0 | 1 | 0 | 0 | spp. 50 |
| <i>Aulacoseira granulata</i>                              | VI | 1263.6 | 0.7 | 49.0  | 0 | 1 | 0 | 0 | spp. 37 |
| <i>Aulacoseira</i> sp.                                    | VI | 5657.2 | 0.6 | 147.0 | 0 | 1 | 0 | 0 | spp. 38 |
| <i>Aulacoseira</i> sp.2                                   | VI | 4834.9 | 0.5 | 76.0  | 0 | 1 | 0 | 0 | spp. 39 |
| Centrales sp.                                             | VI | 5195.4 | 0.6 | 135.0 | 0 | 1 | 0 | 0 | spp. 44 |
| <i>Cyclotella cf. meneghiniana</i>                        | VI | 716.8  | 0.6 | 15.0  | 0 | 1 | 0 | 0 | spp. 40 |
| <i>Cyclotella</i> sp.                                     | VI | 410.5  | 0.8 | 12.0  | 0 | 1 | 0 | 0 | spp. 41 |
| <i>Cyclotella</i> sp. 2                                   | VI | 190.1  | 1.0 | 8.0   | 0 | 1 | 0 | 0 | spp. 42 |
| <i>Cymbela</i> sp.                                        | VI | 9433.0 | 0.3 | 64.0  | 0 | 1 | 0 | 0 | spp. 51 |
| <i>cf. Encyonema</i> sp.                                  | VI | 226.2  | 1.2 | 18.0  | 0 | 1 | 0 | 0 | spp. 52 |
| <i>Fragillaria capucina</i>                               | VI | 648.0  | 0.9 | 33.0  | 0 | 1 | 0 | 0 | spp. 53 |
| <i>Fragillaria capucina</i> var.<br><i>fragilarioides</i> | VI | 989.6  | 0.7 | 36.0  | 0 | 1 | 0 | 0 | spp. 55 |
| <i>Fragillaria capucina</i> var. <i>gracilis</i>          | VI | 730.4  | 0.8 | 31.0  | 0 | 1 | 0 | 0 | spp. 54 |
| <i>Fragillaria</i> sp.                                    | VI | 487.0  | 1.0 | 31.0  | 0 | 1 | 0 | 0 | spp. 56 |
| <i>cf. Frustulia</i> sp.                                  | VI | 1526.8 | 0.5 | 27.0  | 0 | 1 | 0 | 0 | spp. 57 |
| <i>Gomphonema augur</i>                                   | VI | 78.6   | 1.6 | 27.0  | 0 | 1 | 0 | 0 | spp. 58 |
| <i>Gomphonema cf. olivaceum</i>                           | VI | 150.1  | 1.2 | 31.0  | 0 | 1 | 0 | 0 | spp. 59 |

|                                 |    |         |     |       |   |   |   |   |         |
|---------------------------------|----|---------|-----|-------|---|---|---|---|---------|
| <i>Gomphonema cf. truncatum</i> | VI | 139.9   | 1.3 | 33.0  | 0 | 1 | 0 | 0 | spp. 60 |
| <i>Gomphonema</i> sp.           | VI | 758.7   | 0.7 | 23.0  | 0 | 1 | 0 | 0 | spp. 61 |
| <i>Gomphonema</i> sp. 2         | VI | 212.1   | 1.2 | 18.0  | 0 | 1 | 0 | 0 | spp. 62 |
| <i>Gyrosigma/Pleurosigma</i>    | VI | 8278.1  | 0.3 | 61.9  | 0 | 1 | 0 | 0 | spp. 63 |
| <i>Hantzschia</i> sp.           | VI | 966.0   | 1.0 | 46.0  | 0 | 1 | 0 | 0 | spp. 64 |
| <i>Melosira</i> sp.             | VI | 17241.1 | 0.2 | 28.0  | 0 | 1 | 0 | 0 | spp. 43 |
| <i>Navicula</i> sp.             | VI | 2660.9  | 0.5 | 44.0  | 0 | 1 | 0 | 0 | spp. 65 |
| <i>Navicula</i> sp. 2           | VI | 546.6   | 0.9 | 28.6  | 0 | 1 | 0 | 0 | spp. 66 |
| <i>Navicula</i> sp. 3           | VI | 1286.5  | 0.6 | 25.9  | 0 | 1 | 0 | 0 | spp. 67 |
| <i>Navicula</i> sp. 4           | VI | 1060.3  | 0.6 | 25.0  | 0 | 1 | 0 | 0 | spp. 68 |
| <i>Naviculales</i>              | VI | 2937.4  | 0.4 | 34.3  | 0 | 1 | 0 | 0 | spp. 69 |
| <i>Nitzschia</i> sp.            | VI | 395.8   | 1.2 | 41.7  | 0 | 1 | 0 | 0 | spp. 70 |
| <i>Nitzschia</i> sp. 2          | VI | 99.0    | 1.8 | 21.0  | 0 | 1 | 0 | 0 | spp. 71 |
| Pennales sp.                    | VI | 2660.9  | 0.5 | 43.8  | 0 | 1 | 0 | 0 | spp. 82 |
| Pennales sp. 10                 | VI | 754.0   | 0.7 | 19.6  | 0 | 1 | 0 | 0 | spp. 90 |
| Pennales sp. 11                 | VI | 94.3    | 1.3 | 8.0   | 0 | 1 | 0 | 0 | spp. 91 |
| Pennales sp. 12                 | VI | 1005.3  | 0.6 | 20.0  | 0 | 1 | 0 | 0 | spp. 92 |
| Pennales sp. 13                 | VI | 824.7   | 0.8 | 29.7  | 0 | 1 | 0 | 0 | spp. 93 |
| Pennales sp. 2                  | VI | 2544.7  | 0.5 | 40.0  | 0 | 1 | 0 | 0 | spp. 83 |
| Pennales sp. 3                  | VI | 1237.0  | 0.6 | 24.7  | 0 | 1 | 0 | 0 | spp. 84 |
| Pennales sp. 4                  | VI | 2353.8  | 0.5 | 37.0  | 0 | 1 | 0 | 0 | spp. 85 |
| Pennales sp. 5                  | VI | 1357.2  | 0.6 | 27.0  | 0 | 1 | 0 | 0 | spp. 86 |
| Pennales sp. 6                  | VI | 7861.8  | 0.3 | 55.0  | 0 | 1 | 0 | 0 | spp. 87 |
| Pennales sp. 7                  | VI | 1696.5  | 0.5 | 30.0  | 0 | 1 | 0 | 0 | spp. 88 |
| Pennales sp. 8                  | VI | 348.7   | 1.2 | 37.0  | 0 | 1 | 0 | 0 | spp. 89 |
| <i>Pinnularia</i> sp.           | VI | 13589.6 | 0.3 | 71.0  | 0 | 1 | 0 | 0 | spp. 72 |
| <i>Pinnularia</i> sp. 2         | VI | 6013.0  | 0.4 | 49.3  | 0 | 1 | 0 | 0 | spp. 73 |
| <i>Pinnularia</i> sp. 7         | VI | 18746.1 | 0.3 | 62.3  | 0 | 1 | 0 | 0 | spp. 76 |
| <i>Pinullaria</i> sp. 4         | VI | 10449.1 | 0.3 | 48.7  | 0 | 1 | 0 | 0 | spp. 74 |
| <i>Pinullaria</i> sp. 6         | VI | 16760.3 | 0.3 | 64.4  | 0 | 1 | 0 | 0 | spp. 75 |
| <i>Stauroneis borrichii</i>     | VI | 659.7   | 0.8 | 21.0  | 0 | 1 | 0 | 0 | spp. 77 |
| <i>Surirella cf. minuta</i>     | VI | 1520.5  | 0.5 | 16.0  | 0 | 1 | 0 | 0 | spp. 78 |
| <i>Surirella</i> sp.            | VI | 4002.4  | 0.4 | 26.0  | 0 | 1 | 0 | 0 | spp. 79 |
| <i>Synedra</i> sp.              | VI | 19045.7 | 0.4 | 160.9 | 0 | 1 | 0 | 0 | spp. 80 |
| <i>cf. Urosolenia</i> sp.       | VI | 13845.8 | 0.3 | 61.0  | 0 | 1 | 0 | 0 | spp. 81 |
| Chlorophyceae                   |    |         |     |       |   |   |   |   |         |

|                                  |     |        |     |      |   |   |   |   |          |
|----------------------------------|-----|--------|-----|------|---|---|---|---|----------|
| <i>Actinastrum cf. hantzchii</i> | IV  | 388.8  | 1.2 | 25.0 | 0 | 0 | 0 | 0 | spp. 95  |
| <i>Actinastrum</i> sp.           | IV  | 115.2  | 1.9 | 16.0 | 0 | 0 | 0 | 0 | spp. 94  |
| <i>Ankistrodesmus</i> sp.        | IV  | 578.6  | 2.0 | 37.5 | 0 | 0 | 0 | 0 | spp. 96  |
| <i>Chlorella</i> sp. 1           | IV  | 65.5   | 1.2 | 5.0  | 0 | 0 | 0 | 0 | spp. 97  |
| <i>Chlorella</i> sp. 2           | IV  | 46.8   | 1.3 | 4.5  | 0 | 0 | 0 | 0 | spp. 98  |
| <i>Chlorella</i> sp. 3           | IV  | 87.1   | 1.1 | 5.5  | 0 | 0 | 0 | 0 | spp. 99  |
| Chlorococcales sp.               | IV  | 69.5   | 1.2 | 5.1  | 0 | 0 | 0 | 0 | spp. 127 |
| Chlorococcales sp. 2             | IV  | 212.2  | 0.8 | 7.4  | 0 | 0 | 0 | 0 | spp. 128 |
| Chlorococcales sp. 3             | IV  | 33.5   | 1.5 | 4.0  | 0 | 0 | 0 | 0 | spp. 129 |
| Chlorococcales sp. 4             | IV  | 47.4   | 1.3 | 4.5  | 0 | 0 | 0 | 0 | spp. 130 |
| Chlorococcales sp. 5             | VII | 235.6  | 1.1 | 51.2 | 0 | 0 | 1 | 0 | spp. 131 |
| Chlorococcales sp. 6             | VII | 2822.2 | 0.8 | 15.0 | 0 | 0 | 1 | 0 | spp. 132 |
| Chlorococcales sp. 7             | VII | 293.2  | 1.3 | 17.0 | 0 | 0 | 1 | 0 | spp. 133 |
| <i>Coelastrum</i> sp.            | IV  | 8181.2 | 0.2 | 25.0 | 0 | 0 | 0 | 0 | spp. 100 |
| <i>Crucigenia fenestrata</i>     | IV  | 217.8  | 1.0 | 6.1  | 0 | 0 | 0 | 0 | spp. 101 |
| <i>Crucigenia</i> sp. 2          | IV  | 198.0  | 1.0 | 5.5  | 0 | 0 | 0 | 0 | spp. 102 |
| <i>Crucigeniella</i> sp.         | IV  | 1139.0 | 0.6 | 13.6 | 0 | 0 | 0 | 0 | spp. 103 |
| <i>Desmodesmus quadricauda</i>   | IV  | 188.5  | 1.6 | 9.6  | 0 | 0 | 0 | 0 | spp. 104 |
| <i>Desmodesmus</i> sp. 1         | IV  | 301.6  | 1.3 | 8.6  | 0 | 0 | 0 | 0 | spp. 105 |
| <i>Desmodesmus</i> sp. 2         | IV  | 469.1  | 1.2 | 14.4 | 0 | 0 | 0 | 0 | spp. 106 |
| <i>Desmodesmus</i> sp. 3         | IV  | 113.1  | 1.7 | 5.9  | 0 | 0 | 0 | 0 | spp. 107 |
| <i>Desmodesmus</i> sp. 4         | IV  | 94.3   | 1.8 | 5.0  | 0 | 0 | 0 | 0 | spp. 108 |
| <i>Desmodesmus</i> sp. 5         | IV  | 418.9  | 1.1 | 8.0  | 0 | 0 | 0 | 0 | spp. 109 |
| <i>Dictyosphaerium</i> sp.       | VII | 112.3  | 1.7 | 3.5  | 0 | 0 | 1 | 0 | spp. 110 |
| <i>cf. Koliella</i> sp.          | I   | 6.5    | 2.8 | 4.0  | 0 | 0 | 0 | 0 | spp. 111 |
| <i>Monoraphidium arcuatum</i>    | I   | 14.8   | 3.4 | 17.5 | 0 | 0 | 0 | 0 | spp. 112 |
| <i>Monoraphidium contortum</i>   | I   | 7.7    | 4.6 | 17.5 | 0 | 0 | 0 | 0 | spp. 113 |
| <i>Monoraphidium convolutum</i>  | I   | 9.3    | 3.4 | 11.0 | 0 | 0 | 0 | 0 | spp. 114 |
| <i>Monoraphidium komarkovae</i>  | IV  | 23.6   | 4.0 | 40.0 | 0 | 0 | 0 | 0 | spp. 115 |
| <i>Monoraphidium minutum</i>     | I   | 18.9   | 2.1 | 8.0  | 0 | 0 | 0 | 0 | spp. 116 |
| <i>Oocystis</i> sp.              | IV  | 384.9  | 0.7 | 15.0 | 0 | 0 | 0 | 0 | spp. 117 |
| <i>Oocystis</i> sp. 2            | IV  | 150.8  | 0.9 | 8.2  | 0 | 0 | 0 | 0 | spp. 118 |
| <i>Oocystis</i> sp. 3            | IV  | 1140.4 | 0.5 | 18.3 | 0 | 0 | 0 | 0 | spp. 119 |
| <i>Pandorina</i> sp.             | IV  | 1415.8 | 0.4 | 15.7 | 0 | 0 | 0 | 0 | spp. 120 |
| <i>Pediastrum</i> sp.            | IV  | 5717.7 | 0.9 | 56.0 | 0 | 0 | 0 | 0 | spp. 121 |

|                              |    |        |      |      |   |   |   |   |          |
|------------------------------|----|--------|------|------|---|---|---|---|----------|
| <i>Pediastrum</i> sp. 2      | IV | 3518.6 | 1.3  | 50.0 | 0 | 0 | 0 | 0 | spp. 122 |
| <i>Scenedesmus</i> sp.       | IV | 301.6  | 1.3  | 8.9  | 0 | 0 | 0 | 0 | spp. 123 |
| <i>Scenedesmus</i> sp. 2     | IV | 234.6  | 1.2  | 13.5 | 0 | 0 | 0 | 0 | spp. 124 |
| <i>Scenedesmus</i> sp. 3     | IV | 829.4  | 0.9  | 10.6 | 0 | 0 | 0 | 0 | spp. 125 |
| <i>Scenedesmus</i> sp. 4     | IV | 50.3   | 2.5  | 6.0  | 0 | 0 | 0 | 0 | spp. 126 |
| Cryptophyceae                |    |        |      |      |   |   |   |   |          |
| <i>cf. Cryptomonas</i> sp.   | V  | 785.4  | 0.5  | 14.7 | 1 | 0 | 0 | 0 | spp. 134 |
| <i>cf. Cryptomonas</i> sp. 2 | V  | 551.4  | 0.6  | 12.8 | 1 | 0 | 0 | 0 | spp. 135 |
| Cryptophyceae sp.            | V  | 837.8  | 0.5  | 16.0 | 1 | 0 | 0 | 0 | spp. 136 |
| Cryptophyceae sp. 2          | V  | 368.6  | 0.7  | 11.0 | 1 | 0 | 0 | 0 | spp. 137 |
| Cryptophyceae sp. 3          | V  | 188.5  | 0.9  | 10.0 | 1 | 0 | 0 | 0 | spp. 138 |
| Cryptophyceae sp. 4          | V  | 31.56  | 1.54 | 3.9  | 1 | 0 | 0 | 0 | spp. 149 |
| Cryptophyceae sp. 5          | V  | 77.95  | 1.13 | 5.3  | 1 | 0 | 0 | 0 | spp. 150 |
| Zygnematophyceae             |    |        |      |      |   |   |   |   |          |
| <i>Cosmarium</i> sp.         | IV | 1256.6 | 0.6  | 12.0 | 0 | 0 | 0 | 0 | spp. 139 |
| <i>Staurastrum</i> sp.       | IV | 751.4  | 1.0  | 14.2 | 0 | 0 | 0 | 0 | spp. 140 |
| <i>Staurodesmus</i> sp.      | IV | 1118.4 | 0.8  | 35.0 | 0 | 0 | 0 | 0 | spp. 141 |
| Chrysophyceae                |    |        |      |      |   |   |   |   |          |
| <i>Dinobryon</i> sp.         | IV | 815.0  | 0.7  | 38.0 | 0 | 0 | 0 | 0 | spp. 142 |
| Euglenophyceae               |    |        |      |      |   |   |   |   |          |
| <i>Euglena</i> sp. 1         | V  | 2508.1 | 0.3  | 30.5 | 1 | 0 | 0 | 0 | spp. 143 |
| <i>Euglena</i> sp. 2         | V  | 3951.3 | 0.8  | 42.6 | 1 | 0 | 0 | 0 | spp. 144 |
| <i>Euglena</i> sp. 3         | V  | 523.6  | 0.6  | 10.0 | 1 | 0 | 0 | 0 | spp. 145 |
| <i>Phacus</i> sp.            | V  | 1436.8 | 0.4  | 14.0 | 1 | 0 | 0 | 0 | spp. 146 |
| <i>Strombomonas</i> sp.      | V  | 31.1   | 1.5  | 3.9  | 1 | 0 | 0 | 0 | spp. 147 |
| <i>Trachelomonas</i> sp.     | V  | 78.0   | 1.1  | 5.3  | 1 | 0 | 0 | 0 | spp. 148 |
